# Supplementary material for: Not Too Warm, Not Too Cold: Thermal Treatments to Slightly Warmer or Colder Conditions from Mother’s Origin Can Enhance Performance of Montane Butterfly Larvae
Source: MDPI journal article supplement (doi:10.3390/biology11060915), 2022-06-15
Supplement: s1 [file s1]

## **Supporting Information**

**Title:** Not too warm, not too cold: thermal treatments to slightly warmer or colder conditions from mother's origin can enhance performance of montane butterfly larvae

**Konstantina Zografou <sup>1\*</sup>, George C. Adamidis <sup>1,2</sup>, Brent J. Sewall <sup>3</sup> and Andrea Grill <sup>1,4</sup>**

1. Institute of Ecology and Evolution, University of Bern, Baltzerstrasse 6, CH-3012 Bern, Switzerland; adamidis@upatras.gr (G.C.A.); a.grill@univie.ac.at (A.G.)

2. Laboratory of Plant Physiology, Department of Biology, University of Patras, 26504 Patras, Greece

3. Department of Biology, Temple University, Philadelphia, PA, 19122, USA; bjsewall@temple.edu

4. Department of Evolutionary Biology, University of Vienna, Djerassiplatz 1, A-1030 Vienna, Austria

\*Correspondence: konstantina.zografou@temple.edu

**Table S1.** Averaged temperature treatments per climatic chamber during the time of the experiments.

Individual caterpillars were equally divided into the three climatic chambers of high, medium and low temperature treatments (corresponding to low, medium and high elevation zone) after hibernation and mass measurements were taken systematically every week.

Temperature treatments cycled diurnally between the average long-term minimum and maximum historical temperatures in each climatic chamber. In addition, they were adjusted in a weekly interval to reflect seasonal changes in temperature, starting on the third week of June. The day-night-rhythm of the illumination was also adjusted weekly according to averaged weekly day length for 2019 (week 1/2 15.5 h, week 3 15.4 h, week 4 15.3, week 5 15.2 h, week 6 15 h, week 7 14.4 h, week 8 14.2 h). A gradual transition of one hour was applied between day and night conditions (and vice versa). The averaged values that included the day-night rhythm (photoperiod) were used in the analyses.

| Treatments | Week | Day C° | Night C° | Averaged values<br>with photoperiod |
|------------|------|--------|----------|-------------------------------------|
| High C°    | 1    | 13.54  | 7.89     | 10.87                               |
| Medium C°  | 1    | 11.85  | 6.04     | 8.83                                |
| Low C°     | 1    | 8.79   | 3.51     | 6.14                                |
| High C°    | 2    | 14.53  | 8.69     | 11.70                               |
| Medium C°  | 2    | 12.71  | 6.69     | 9.63                                |
| Low C°     | 2    | 9.64   | 4.25     | 6.85                                |
| High C°    | 3    | 14.37  | 8.64     | 11.56                               |
| Medium C°  | 3    | 12.56  | 6.62     | 9.48                                |
| Low C°     | 3    | 9.55   | 4.08     | 6.73                                |
| High C°    | 4    | 13.77  | 7.98     | 10.90                               |
| Medium C°  | 4    | 11.82  | 6.09     | 8.87                                |
| Low C°     | 4    | 8.79   | 3.52     | 6.07                                |
| High C°    | 5    | 15.22  | 9.28     | 12.42                               |
| Medium C°  | 5    | 13.37  | 7.31     | 10.28                               |
| Low C°     | 5    | 11.04  | 5.32     | 8.14                                |
| High C°    | 6    | 14.77  | 9.29     | 12.01                               |
| Medium C°  | 6    | 13.06  | 7.37     | 10.11                               |
| Low C°     | 6    | 10.52  | 5.02     | 7.62                                |
| High C°    | 7    | 15.32  | 9.81     | 12.60                               |
| Medium C°  | 7    | 13.50  | 7.87     | 10.61                               |
| Low C°     | 7    | 10.66  | 5.35     | 7.88                                |
| High C°    | 8    | 13.59  | 8.26     | 10.96                               |
| Medium C°  | 8    | 12.10  | 6.54     | 9.21                                |
| Low C°     | 8    | 9.29   | 4.02     | 6.46                                |

**Table S2.** Table accumulates all five *Erebia* butterflies and their offspring that participated in our experiment and were further considered in the statistical analysis. Mother's elevation is the elevation where the mother was originally collected in the field. Temperature treatment is the division of the individuals per species per elevation of origin into low, medium and high temperature treatment. Up/Down movements refer to upslope/ downslope movement from mother's origin elevation or temperature. In the last column an average of the weight is given for each individual in mg.

| Species           | MotherID | Individual | Mother's elevation | Mother's elevation (categorical) | Temperature treatment | Up/Down Movement | Average of Weight (gr) |
|-------------------|----------|------------|--------------------|----------------------------------|-----------------------|------------------|------------------------|
| Erebia aethiops   | M2       | In1        | 1823               | Low                              | High                  | no change        | 0.96                   |
| Erebia aethiops   | M2       | In10       | 1823               | Low                              | Medium                | up1              | 0.43                   |
| Erebia aethiops   | M2       | In11       | 1823               | Low                              | Low                   | up2              | 1.14                   |
| Erebia aethiops   | M2       | In12       | 1823               | Low                              | Low                   | up2              | 0.88                   |
| Erebia aethiops   | M2       | In13       | 1823               | Low                              | High                  | no change        | 0.86                   |
| Erebia aethiops   | M2       | In14       | 1823               | Low                              | Low                   | up2              | 1.62                   |
| Erebia aethiops   | M2       | In15       | 1823               | Low                              | High                  | no change        | 1.79                   |
| Erebia aethiops   | M2       | In16       | 1823               | Low                              | High                  | no change        | 1.89                   |
| Erebia aethiops   | M2       | In17       | 1823               | Low                              | High                  | no change        | 1.00                   |
| Erebia aethiops   | M2       | In18       | 1823               | Low                              | High                  | no change        | 1.45                   |
| Erebia aethiops   | M2       | In19       | 1823               | Low                              | Medium                | up1              | 0.75                   |
| Erebia aethiops   | M2       | In2        | 1823               | Low                              | Medium                | up1              | 0.97                   |
| Erebia aethiops   | M2       | In3        | 1823               | Low                              | Low                   | up2              | 0.85                   |
| Erebia aethiops   | M2       | In4        | 1823               | Low                              | Medium                | up1              | 1.54                   |
| Erebia aethiops   | M2       | In5        | 1823               | Low                              | Low                   | up2              | 1.27                   |
| Erebia aethiops   | M2       | In6        | 1823               | Low                              | Medium                | up1              | 0.61                   |
| Erebia aethiops   | M2       | In7        | 1823               | Low                              | Medium                | up1              | 0.44                   |
| Erebia aethiops   | M2       | In8        | 1823               | Low                              | Low                   | up2              | 0.73                   |
| Erebia aethiops   | M2       | In9        | 1823               | Low                              | Medium                | up1              | 0.59                   |
| Erebia aethiops   | M5       | In1        | 1823               | Low                              | Medium                | up1              | 1.73                   |
| Erebia aethiops   | M7       | In1        | 1823               | Low                              | Low                   | up2              | 1.74                   |
| Erebia aethiops   | MF3      | In1        | 1735               | Low                              | Low                   | up2              | 0.73                   |
| Erebia aethiops   | MF3      | In2        | 1735               | Low                              | High                  | no change        | 1.51                   |
| Erebia cassioides | M11      | In25       | 2123               | Medium                           | Low                   | up1              | 1.53                   |
| Erebia cassioides | M11      | In26       | 2123               | Medium                           | Low                   | up1              | 0.87                   |
| Erebia cassioides | M11      | In27       | 2123               | Medium                           | Medium                | no change        | 0.81                   |
| Erebia cassioides | M11      | In28       | 2123               | Medium                           | High                  | down1            | 1.35                   |
| Erebia cassioides | M11      | In29       | 2123               | Medium                           | Low                   | up1              | 0.57                   |
| Erebia cassioides | M11      | In30       | 2123               | Medium                           | Medium                | no change        | 0.82                   |
| Erebia cassioides | M11      | In31       | 2123               | Medium                           | Low                   | up1              | 0.72                   |
| Erebia cassioides | M11      | In32       | 2123               | Medium                           | Low                   | up1              | 0.74                   |
| Erebia cassioides | M11      | In33       | 2123               | Medium                           | Medium                | no change        | 0.67                   |

|                   |        |      |      |        |        |           |      |
|-------------------|--------|------|------|--------|--------|-----------|------|
| Erebia cassioides | M11    | In34 | 2123 | Medium | Medium | no change | 1.14 |
| Erebia cassioides | M11    | In35 | 2123 | Medium | High   | down1     | 0.74 |
| Erebia cassioides | M11    | In36 | 2123 | Medium | Medium | no change | 0.90 |
| Erebia cassioides | M11    | In37 | 2123 | Medium | High   | down1     | 1.35 |
| Erebia cassioides | M11    | In38 | 2123 | Medium | Low    | up1       | 0.88 |
| Erebia cassioides | M11    | In39 | 2123 | Medium | Medium | no change | 0.87 |
| Erebia cassioides | M11    | In40 | 2123 | Medium | Low    | up1       | 0.67 |
| Erebia cassioides | M11    | In41 | 2123 | Medium | Low    | up1       | 0.64 |
| Erebia cassioides | M11    | In42 | 2123 | Medium | High   | down1     | 1.04 |
| Erebia cassioides | M11    | In43 | 2123 | Medium | High   | down1     | 1.07 |
| Erebia cassioides | M11    | In44 | 2123 | Medium | Low    | up1       | 0.62 |
| Erebia cassioides | M11    | In45 | 2123 | Medium | Medium | no change | 1.50 |
| Erebia cassioides | M11    | In46 | 2123 | Medium | Medium | no change | 1.17 |
| Erebia cassioides | M11    | In47 | 2123 | Medium | High   | down1     | 1.24 |
| Erebia cassioides | M11    | In48 | 2123 | Medium | Low    | up1       | 0.97 |
| Erebia cassioides | M11    | In49 | 2123 | Medium | High   | down1     | 1.39 |
| Erebia cassioides | M11    | In50 | 2123 | Medium | High   | down1     | 1.41 |
| Erebia cassioides | M11    | In51 | 2123 | Medium | Medium | no change | 1.29 |
| Erebia cassioides | M11    | In52 | 2123 | Medium | High   | down1     | 0.91 |
| Erebia cassioides | M11    | In53 | 2123 | Medium | Medium | no change | 2.02 |
| Erebia cassioides | M11    | In54 | 2123 | Medium | Medium | no change | 1.56 |
| Erebia cassioides | M11    | In55 | 2123 | Medium | Low    | up1       | 0.99 |
| Erebia cassioides | M11    | In56 | 2123 | Medium | Low    | up1       | 0.66 |
| Erebia cassioides | M11    | In57 | 2123 | Medium | High   | down1     | 1.23 |
| Erebia cassioides | M11    | In58 | 2123 | Medium | High   | down1     | 1.69 |
| Erebia cassioides | Mx1973 | In1  | 2300 | Medium | Low    | up1       | 0.80 |
| Erebia cassioides | Mx1973 | In2  | 2300 | Medium | Medium | no change | 1.03 |
| Erebia cassioides | Mx1973 | In3  | 2300 | Medium | High   | down1     | 0.82 |
| Erebia cassioides | Mx2013 | In1  | 2275 | Medium | Low    | up1       | 0.48 |
| Erebia cassioides | Mx2013 | In2  | 2275 | Medium | High   | down1     | 0.45 |
| Erebia cassioides | Mx2027 | In1  | 2250 | Medium | High   | down1     | 0.44 |
| Erebia manto      | Ma3    | In1  | 2283 | Medium | High   | down1     | 0.46 |
| Erebia manto      | Ma3    | In10 | 2283 | Medium | High   | down1     | 0.54 |
| Erebia manto      | Ma3    | In11 | 2283 | Medium | High   | down1     | 0.63 |
| Erebia manto      | Ma3    | In12 | 2283 | Medium | High   | down1     | 0.60 |
| Erebia manto      | Ma3    | In13 | 2283 | Medium | Low    | up1       | 0.31 |
| Erebia manto      | Ma3    | In14 | 2283 | Medium | Low    | up1       | 0.55 |
| Erebia manto      | Ma3    | In15 | 2283 | Medium | High   | down1     | 0.38 |
| Erebia manto      | Ma3    | In16 | 2283 | Medium | Medium | no change | 0.33 |
| Erebia manto      | Ma3    | In17 | 2283 | Medium | Medium | no change | 0.36 |
| Erebia manto      | Ma3    | In18 | 2283 | Medium | Low    | up1       | 0.33 |
| Erebia manto      | Ma3    | In19 | 2283 | Medium | High   | down1     | 0.50 |
| Erebia manto      | Ma3    | In2  | 2283 | Medium | Medium | no change | 0.39 |
| Erebia manto      | Ma3    | In20 | 2283 | Medium | High   | down1     | 0.46 |

|                 |        |      |      |        |        |           |      |
|-----------------|--------|------|------|--------|--------|-----------|------|
| Erebia manto    | Ma3    | In21 | 2283 | Medium | High   | down1     | 0.52 |
| Erebia manto    | Ma3    | In22 | 2283 | Medium | High   | down1     | 0.57 |
| Erebia manto    | Ma3    | In23 | 2283 | Medium | Medium | no change | 0.41 |
| Erebia manto    | Ma3    | In24 | 2283 | Medium | Medium | no change | 0.45 |
| Erebia manto    | Ma3    | In25 | 2283 | Medium | Low    | up1       | 0.53 |
| Erebia manto    | Ma3    | In26 | 2283 | Medium | Low    | up1       | 0.77 |
| Erebia manto    | Ma3    | In27 | 2283 | Medium | Low    | up1       | 0.39 |
| Erebia manto    | Ma3    | In28 | 2283 | Medium | Medium | no change | 0.40 |
| Erebia manto    | Ma3    | In29 | 2283 | Medium | Low    | up1       | 0.42 |
| Erebia manto    | Ma3    | In3  | 2283 | Medium | Low    | up1       | 0.53 |
| Erebia manto    | Ma3    | In30 | 2283 | Medium | Low    | up1       | 0.37 |
| Erebia manto    | Ma3    | In4  | 2283 | Medium | Medium | no change | 0.63 |
| Erebia manto    | Ma3    | In5  | 2283 | Medium | Medium | no change | 0.58 |
| Erebia manto    | Ma3    | In6  | 2283 | Medium | Medium | no change | 0.78 |
| Erebia manto    | Ma3    | In7  | 2283 | Medium | High   | down1     | 0.59 |
| Erebia manto    | Ma3    | In8  | 2283 | Medium | Medium | no change | 0.47 |
| Erebia manto    | Ma3    | In9  | 2283 | Medium | Low    | up1       | 0.36 |
| Erebia nivalis  | Mx193  | In1  | 2531 | High   | Low    | no change | 0.46 |
| Erebia nivalis  | Mx193  | In2  | 2531 | High   | High   | down2     | 0.50 |
| Erebia nivalis  | Mx193  | In3  | 2531 | High   | Medium | down1     | 0.49 |
| Erebia nivalis  | Mz10   | In1  | 2481 | High   | Medium | down1     | 0.54 |
| Erebia nivalis  | Mz10   | In2  | 2481 | High   | High   | down2     | 0.75 |
| Erebia nivalis  | Mz10   | In3  | 2481 | High   | Medium | down1     | 0.65 |
| Erebia nivalis  | Mz10   | In4  | 2481 | High   | Low    | no change | 0.28 |
| Erebia nivalis  | Mz10   | In5  | 2481 | High   | Low    | no change | 0.80 |
| Erebia nivalis  | Mz10   | In6  | 2481 | High   | High   | down2     | 0.73 |
| Erebia nivalis  | Mz10   | In7  | 2481 | High   | Low    | no change | 0.64 |
| Erebia nivalis  | Mz10   | In8  | 2481 | High   | Medium | down1     | 0.53 |
| Erebia nivalis  | Mz10   | In9  | 2481 | High   | Low    | no change | 0.42 |
| Erebia nivalis  | Mz10   | In10 | 2481 | High   | Medium | down1     | 0.56 |
| Erebia nivalis  | Mz10   | In11 | 2481 | High   | High   | down2     | 0.46 |
| Erebia nivalis  | Mz16   | In1  | 2652 | High   | Low    | no change | 0.27 |
| Erebia nivalis  | Mz16   | In2  | 2652 | High   | Low    | no change | 0.76 |
| Erebia nivalis  | Mz16   | In3  | 2652 | High   | High   | down2     | 0.46 |
| Erebia nivalis  | Mz16   | In4  | 2652 | High   | High   | down2     | 0.64 |
| Erebia nivalis  | Mz16   | In5  | 2652 | High   | Low    | no change | 0.97 |
| Erebia nivalis  | Mz16   | In6  | 2652 | High   | Medium | down1     | 0.72 |
| Erebia nivalis  | Mz16   | In7  | 2652 | High   | High   | down2     | 0.55 |
| Erebia nivalis  | Mz16   | In8  | 2652 | High   | Medium | down1     | 0.85 |
| Erebia nivalis  | Mz16   | In9  | 2652 | High   | Medium | down1     | 0.80 |
| Erebia nivalis  | Mz16   | In10 | 2652 | High   | Low    | no change | 0.98 |
| Erebia tyndarus | Mx1957 | In1  | 2486 | High   | Medium | down1     | 0.35 |
| Erebia tyndarus | Mx1957 | In10 | 2486 | High   | Medium | down1     | 0.75 |
| Erebia tyndarus | Mx1957 | In11 | 2486 | High   | Medium | down1     | 0.53 |

|                 |        |      |      |        |        |           |      |
|-----------------|--------|------|------|--------|--------|-----------|------|
| Erebia tyndarus | Mx1957 | ln12 | 2486 | High   | Low    | no change | 0.66 |
| Erebia tyndarus | Mx1957 | ln13 | 2486 | High   | Low    | no change | 0.57 |
| Erebia tyndarus | Mx1957 | ln14 | 2486 | High   | Medium | down1     | 0.60 |
| Erebia tyndarus | Mx1957 | ln15 | 2486 | High   | Low    | no change | 0.35 |
| Erebia tyndarus | Mx1957 | ln16 | 2486 | High   | High   | down2     | 0.43 |
| Erebia tyndarus | Mx1957 | ln17 | 2486 | High   | High   | down2     | 0.39 |
| Erebia tyndarus | Mx1957 | ln18 | 2486 | High   | High   | down2     | 0.59 |
| Erebia tyndarus | Mx1957 | ln19 | 2486 | High   | Medium | down1     | 0.64 |
| Erebia tyndarus | Mx1957 | ln2  | 2486 | High   | High   | down2     | 0.38 |
| Erebia tyndarus | Mx1957 | ln3  | 2486 | High   | Low    | no change | 0.41 |
| Erebia tyndarus | Mx1957 | ln4  | 2486 | High   | Medium | down1     | 0.48 |
| Erebia tyndarus | Mx1957 | ln5  | 2486 | High   | High   | down2     | 0.34 |
| Erebia tyndarus | Mx1957 | ln6  | 2486 | High   | Low    | no change | 0.52 |
| Erebia tyndarus | Mx1957 | ln7  | 2486 | High   | High   | down2     | 0.46 |
| Erebia tyndarus | Mx1957 | ln8  | 2486 | High   | High   | down2     | 0.70 |
| Erebia tyndarus | Mx1957 | ln9  | 2486 | High   | Low    | no change | 0.65 |
| Erebia tyndarus | Mx1964 | ln1  | 2486 | High   | Medium | down1     | 0.41 |
| Erebia tyndarus | Mx1964 | ln10 | 2486 | High   | Medium | down1     | 1.32 |
| Erebia tyndarus | Mx1964 | ln11 | 2486 | High   | Low    | no change | 0.71 |
| Erebia tyndarus | Mx1964 | ln12 | 2486 | High   | Low    | no change | 0.74 |
| Erebia tyndarus | Mx1964 | ln2  | 2486 | High   | Low    | no change | 0.81 |
| Erebia tyndarus | Mx1964 | ln3  | 2486 | High   | High   | down2     | 0.42 |
| Erebia tyndarus | Mx1964 | ln4  | 2486 | High   | High   | down2     | 0.67 |
| Erebia tyndarus | Mx1964 | ln5  | 2486 | High   | Medium | down1     | 0.39 |
| Erebia tyndarus | Mx1964 | ln6  | 2486 | High   | Low    | no change | 0.39 |
| Erebia tyndarus | Mx1964 | ln7  | 2486 | High   | High   | down2     | 0.76 |
| Erebia tyndarus | Mx1964 | ln8  | 2486 | High   | Medium | down1     | 0.63 |
| Erebia tyndarus | Mx1964 | ln9  | 2486 | High   | High   | down2     | 0.92 |
| Erebia tyndarus | Mx1965 | ln4  | 2486 | High   | High   | down2     | 0.84 |
| Erebia tyndarus | Mx1966 | ln1  | 2486 | High   | Low    | no change | 0.45 |
| Erebia tyndarus | Mz7    | ln26 | 2274 | Medium | Medium | no change | 0.37 |
| Erebia tyndarus | Mz7    | ln27 | 2274 | Medium | High   | down1     | 0.61 |
| Erebia tyndarus | Mz7    | ln28 | 2274 | Medium | Low    | up1       | 0.47 |
| Erebia tyndarus | Mz7    | ln29 | 2274 | Medium | High   | down1     | 0.60 |
| Erebia tyndarus | Mz7    | ln30 | 2274 | Medium | High   | down1     | 0.93 |
| Erebia tyndarus | Mz7    | ln31 | 2274 | Medium | Medium | no change | 0.41 |
| Erebia tyndarus | Mz7    | ln32 | 2274 | Medium | Low    | up1       | 0.52 |
| Erebia tyndarus | Mz7    | ln33 | 2274 | Medium | Low    | up1       | 0.55 |
| Erebia tyndarus | Mz7    | ln34 | 2274 | Medium | Low    | up1       | 0.60 |
| Erebia tyndarus | Mz7    | ln35 | 2274 | Medium | Medium | no change | 0.44 |
| Erebia tyndarus | Mz7    | ln36 | 2274 | Medium | Low    | up1       | 0.47 |
| Erebia tyndarus | Mz7    | ln37 | 2274 | Medium | Medium | no change | 0.57 |
| Erebia tyndarus | Mz7    | ln38 | 2274 | Medium | Low    | up1       | 0.50 |
| Erebia tyndarus | Mz7    | ln39 | 2274 | Medium | Medium | no change | 0.54 |

|                 |     |      |      |        |        |           |      |
|-----------------|-----|------|------|--------|--------|-----------|------|
| Erebia tyndarus | Mz7 | In40 | 2274 | Medium | High   | down1     | 0.46 |
| Erebia tyndarus | Mz7 | In41 | 2274 | Medium | Medium | no change | 0.62 |
| Erebia tyndarus | Mz7 | In42 | 2274 | Medium | Low    | up1       | 0.48 |
| Erebia tyndarus | Mz7 | In43 | 2274 | Medium | High   | down1     | 0.60 |
| Erebia tyndarus | Mz7 | In44 | 2274 | Medium | Medium | no change | 0.62 |
| Erebia tyndarus | Mz7 | In45 | 2274 | Medium | High   | down1     | 0.58 |
| Erebia tyndarus | Mz7 | In46 | 2274 | Medium | High   | down1     | 0.45 |
| Erebia tyndarus | Mz7 | In47 | 2274 | Medium | Medium | no change | 0.58 |
| Erebia tyndarus | Mz7 | In48 | 2274 | Medium | Medium | no change | 0.81 |
| Erebia tyndarus | Mz7 | In49 | 2274 | Medium | Low    | up1       | 0.53 |
| Erebia tyndarus | Mz7 | In50 | 2274 | Medium | High   | down1     | 0.46 |
| Erebia tyndarus | Mz7 | In51 | 2274 | Medium | High   | down1     | 0.25 |
| Erebia tyndarus | Mz7 | In52 | 2274 | Medium | High   | down1     | 0.61 |
| Erebia tyndarus | Mz7 | In53 | 2274 | Medium | Low    | up1       | 0.42 |
| Erebia tyndarus | Mz7 | In54 | 2274 | Medium | Low    | up1       | 0.54 |
| Erebia tyndarus | Mz7 | In55 | 2274 | Medium | Low    | up1       | 0.37 |
| Erebia tyndarus | Mz7 | In56 | 2274 | Medium | Medium | no change | 0.73 |
| Erebia tyndarus | Mz7 | In57 | 2274 | Medium | High   | down1     | 0.45 |
| Erebia tyndarus | Mz7 | In58 | 2274 | Medium | Medium | no change | 0.59 |
| Erebia tyndarus | Mz7 | In59 | 2274 | Medium | Low    | up1       | 0.37 |
| Erebia tyndarus | Mz7 | In60 | 2274 | Medium | High   | down1     | 0.79 |
| Erebia tyndarus | Mz7 | In61 | 2274 | Medium | Medium | no change | 0.36 |
| Erebia tyndarus | Mz7 | In62 | 2274 | Medium | Medium | no change | 0.72 |
| Erebia tyndarus | Mz7 | In63 | 2274 | Medium | Medium | no change | 0.62 |
| Erebia tyndarus | Mz7 | In64 | 2274 | Medium | High   | down1     | 0.75 |
| Erebia tyndarus | Mz7 | In65 | 2274 | Medium | Low    | up1       | 0.50 |
| Erebia tyndarus | Mz7 | In66 | 2274 | Medium | Low    | up1       | 0.66 |
| Erebia tyndarus | Mz7 | In67 | 2274 | Medium | High   | down1     | 0.52 |
| Erebia tyndarus | Mz7 | In68 | 2274 | Medium | Medium | no change | 0.68 |
| Erebia tyndarus | Mz7 | In69 | 2274 | Medium | Low    | up1       | 0.69 |
| Erebia tyndarus | Mz7 | In70 | 2274 | Medium | High   | down1     | 1.07 |
| Erebia tyndarus | Mz7 | In71 | 2274 | Medium | Low    | up1       | 0.38 |
| Erebia tyndarus | Mz7 | In72 | 2274 | Medium | Medium | no change | 1.29 |
| Erebia tyndarus | Mz7 | In73 | 2274 | Medium | Low    | up1       | 0.65 |
| Erebia tyndarus | Mz7 | In74 | 2274 | Medium | High   | down1     | 0.65 |

**Table S3.** Model fitted to explain differences in caterpillars' weight under different temperature treatments. Individual was fitted as a random coefficient. All terms included in the maximal model structure are shown, together with their contribution to the final model which contained them. Terms retained in the minimal model are shown in **bold**. Results are shown for models fitted for individuals that had two or more biomass measurements. Response variable was logged transformed and standardized by subdividing weekly weights to the first measurement (first week) and then discarded the first measurements from the analysis.

| Variable                | $\chi^2$ | Df | P-value |
|-------------------------|----------|----|---------|
| <b>Time</b>             | 33.11    | 1  | <0.001  |
| <b>UpDown</b>           | 11.21    | 4  | 0.02    |
| <b>Treatment</b>        | 9.12     | 2  | 0.01    |
| <b>Mother Elevation</b> | 14.01    | 1  | <0.001  |
| <b>Time:UpDown</b>      | 11.69    | 4  | 0.02    |
| <b>Time:Treatment</b>   | 9.19     | 2  | 0.01    |
| Species                 | 9.21     | 4  | 0.06    |
| Temperature             | 0.23     | 1  | 0.63    |
| Species:Time            | 4.00     | 4  | 0.41    |
| Mother                  |          |    |         |
| Elevation:Treatment     | 4.78     | 2  | 0.09    |
| Species:Temperature     | 5.21     | 4  | 0.27    |

“:” represents an interaction between terms; “UpDown” refer to upslope/ downslope movements;

Treatment refers to temperature treatments



**Table S4.** Individual models fitted to explain differences in species performance under different thermal treatments. Individual was fitted as a random coefficient. “:” represents an interaction between terms. Results are shown for models fitted for individuals that had two or more mass measurements.

|                      | Variable       | $\chi^2$ | Df | P-value |
|----------------------|----------------|----------|----|---------|
| <i>E. aethiops</i>   | Treatments     | 1.75     | 2  | 0.42    |
|                      | Time           | 13.35    | 1  | <0.001  |
|                      | Treatment:Time | 6.64     | 2  | 0.04    |
| <i>E. cassioides</i> | Treatments     | 13.56    | 2  | <0.001  |
|                      | Time           | 45.44    | 1  | <0.001  |
|                      | Treatment:Time | 30.54    | 2  | <0.001  |
| <i>E. manto</i>      | Treatments     | 4.15     | 2  | 0.13    |
|                      | Time           | 4.30     | 1  | 0.04    |
|                      | Treatment:Time | 1.88     | 2  | 0.39    |
| <i>E. nivalis</i>    | Treatments     | 14.54    | 2  | <0.001  |
|                      | Time           | 0.03     | 1  | 0.86    |
|                      | Treatment:Time | 1.03     | 2  | 0.60    |
| <i>E. tyndarus</i>   | Treatments     | 9.28     | 2  | 0.01    |
|                      | Time           | 4.09     | 1  | 0.04    |
|                      | Treatment:Time | 1.04     | 2  | 0.59    |

“:” represents an interaction between terms; Treatment refers to temperature treatments.
